# Supplementary material
Source: ML conference proceedings conference paper supplement (https://proceedings.neurips.cc/paper_files/paper/2015/hash/14bfa6bb14875e45bba028a21ed38046-Abstract.html)
Supplement: Supplementary file [file 14bfa6bb14875e45bba028a21ed38046-Supplemental.zip]

---

# Faster R-CNN: Towards Real-Time Object Detection with Region Proposal Networks

## Supplementary Materials

---

Shaoqing Ren   Kaiming He   Ross Girshick   Jian Sun

Microsoft Research

{v-shren, kahe, rbg, jiansun}@microsoft.com

Table 1: Results on PASCAL VOC 2007 test set with Fast R-CNN detectors and VGG-16. For RPN, the train-time proposals for Fast R-CNN are 2k. RPN\* denotes the unsharing feature version.

| method | # box | data  | mAP         | areo        | bike        | bird        | boat        | bottle      | bus         | car         | cat         | chair       | cow         | table       | dog         | horse       | mbike       | person      | plant       | sheep       | sofa        | train       | tv          |
|--------|-------|-------|-------------|-------------|-------------|-------------|-------------|-------------|-------------|-------------|-------------|-------------|-------------|-------------|-------------|-------------|-------------|-------------|-------------|-------------|-------------|-------------|-------------|
| SS     | 2k    | 07    | 66.9        | 74.5        | 78.3        | 69.2        | 53.2        | 36.6        | 77.3        | 78.2        | 82.0        | 40.7        | 72.7        | 67.9        | 79.6        | 79.2        | 73.0        | 69.0        | 30.1        | 65.4        | 70.2        | 75.8        | 65.8        |
| SS     | 2k    | 07+12 | 70.0        | <b>77.0</b> | 78.1        | 69.3        | 59.4        | 38.3        | 81.6        | 78.6        | <b>86.7</b> | 42.8        | 78.8        | <b>68.9</b> | 84.7        | 82.0        | 76.6        | 69.9        | 31.8        | 70.1        | <b>74.8</b> | 80.4        | 70.4        |
| RPN*   | 300   | 07    | 68.5        | 74.1        | 77.2        | 67.7        | 53.9        | 51.0        | 75.1        | 79.2        | 78.9        | 50.7        | 78.0        | 61.1        | 79.1        | 81.9        | 72.2        | 75.9        | 37.2        | 71.4        | 62.5        | 77.4        | 66.4        |
| RPN    | 300   | 07    | 69.9        | 70.0        | <b>80.6</b> | 70.1        | 57.3        | 49.9        | 78.2        | 80.4        | 82.0        | <b>52.2</b> | 75.3        | 67.2        | 80.3        | 79.8        | 75.0        | 76.3        | <b>39.1</b> | 68.3        | 67.3        | 81.1        | 67.6        |
| RPN    | 300   | 07+12 | <b>73.2</b> | 76.5        | 79.0        | <b>70.9</b> | <b>65.5</b> | <b>52.1</b> | <b>83.1</b> | <b>84.7</b> | 86.4        | 52.0        | <b>81.9</b> | 65.7        | <b>84.8</b> | <b>84.6</b> | <b>77.5</b> | <b>76.7</b> | 38.8        | <b>73.6</b> | 73.9        | <b>83.0</b> | <b>72.6</b> |

Table 2: Results on PASCAL VOC 2012 test set with Fast R-CNN detectors and VGG-16. For RPN, the train-time proposals for Fast R-CNN are 2k.

| method | # box | data   | mAP         | areo        | bike        | bird        | boat        | bottle      | bus         | car         | cat         | chair       | cow         | table       | dog         | horse       | mbike       | person      | plant       | sheep       | sofa        | train       | tv          |
|--------|-------|--------|-------------|-------------|-------------|-------------|-------------|-------------|-------------|-------------|-------------|-------------|-------------|-------------|-------------|-------------|-------------|-------------|-------------|-------------|-------------|-------------|-------------|
| SS     | 2k    | 12     | 65.7        | 80.3        | 74.7        | 66.9        | 46.9        | 37.7        | 73.9        | 68.6        | 87.7        | 41.7        | 71.1        | 51.1        | 86.0        | 77.8        | 79.8        | 69.8        | 32.1        | 65.5        | 63.8        | 76.4        | 61.7        |
| SS     | 2k    | 07++12 | 68.4        | 82.3        | 78.4        | 70.8        | 52.3        | 38.7        | <b>77.8</b> | 71.6        | <b>89.3</b> | 44.2        | 73.0        | 55.0        | <b>87.5</b> | 80.5        | 80.8        | 72.0        | 35.1        | 68.3        | <b>65.7</b> | 80.4        | <b>64.2</b> |
| RPN    | 300   | 12     | 67.0        | 82.3        | 76.4        | 71.0        | 48.4        | 45.2        | 72.1        | 72.3        | 87.3        | 42.2        | 73.7        | 50.0        | 86.8        | 78.7        | 78.4        | 77.4        | 34.5        | 70.1        | 57.1        | 77.1        | 58.9        |
| RPN    | 300   | 07++12 | <b>70.4</b> | <b>84.9</b> | <b>79.8</b> | <b>74.3</b> | <b>53.9</b> | <b>49.8</b> | 77.5        | <b>75.9</b> | 88.5        | <b>45.6</b> | <b>77.1</b> | <b>55.3</b> | 86.9        | <b>81.7</b> | <b>80.9</b> | <b>79.6</b> | <b>40.1</b> | <b>72.6</b> | 60.9        | <b>81.2</b> | 61.5        |

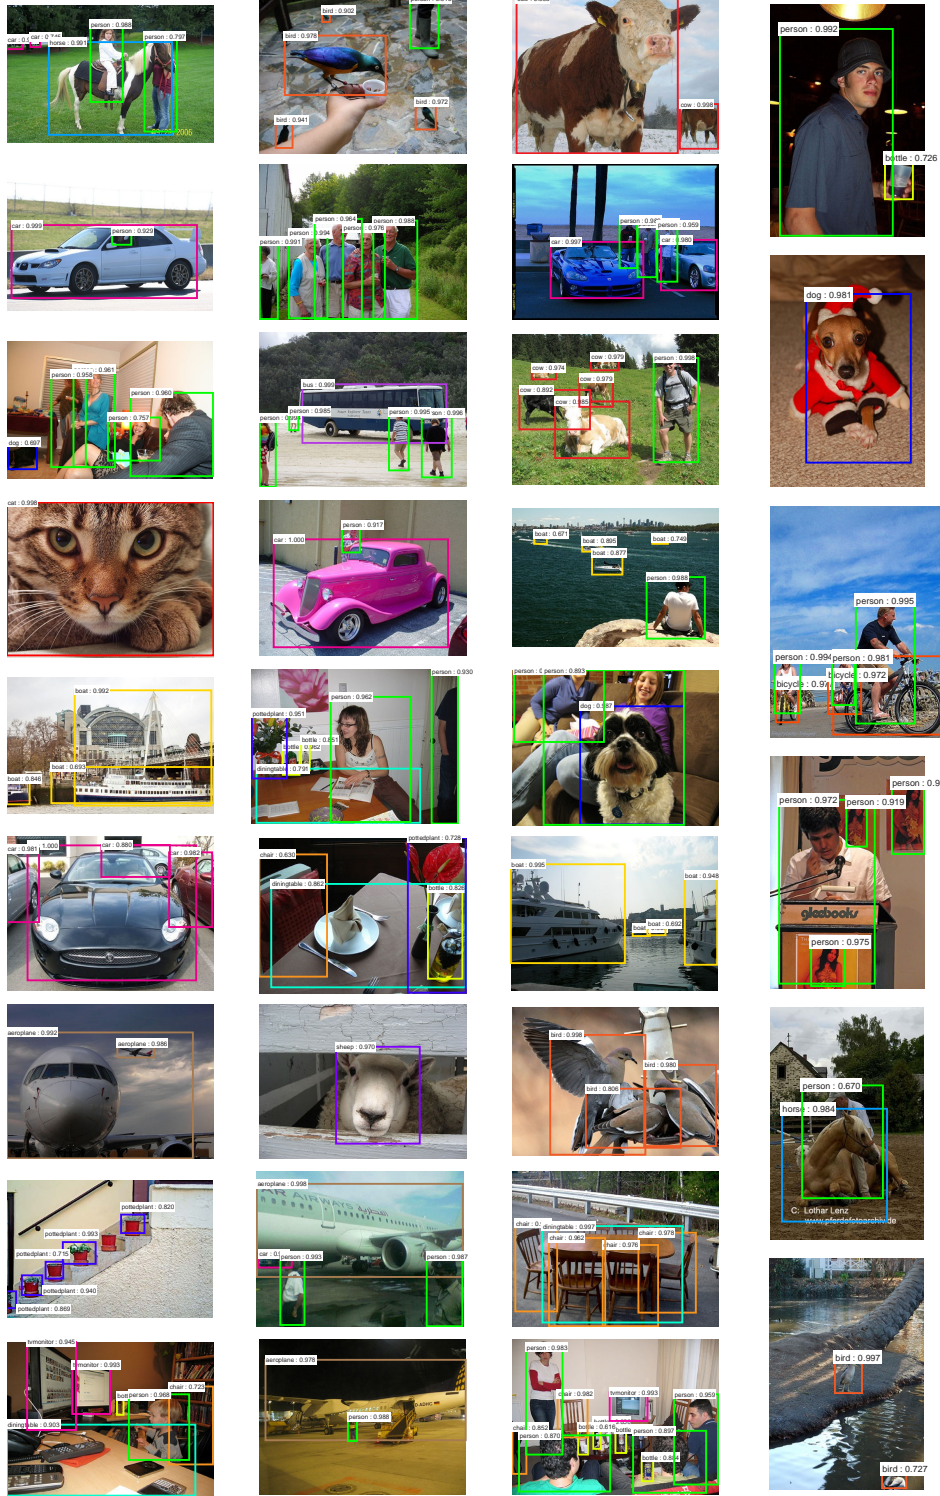

Figure 1: Examples on the PASCAL VOC 2007 test set of *ultimate detection results* using RPN + Fast R-CNN with shared features. The model is VGG-16 and the training data is 07+12 trainval. Our method detects objects of a wide range of scales and aspect ratios. Each output box is associated with a category label and a softmax score in  $[0, 1]$ . A score threshold of 0.6 is used to display these images. The running time for obtaining these results is **198ms** per image, *including all steps*.
